# Supplementary material
Source: publisher figshare collection journal article supplement (https://acs.figshare.com/ndownloader/files/4133326)
Supplement: Supplementary file 1 [file 4133326]

Supplementary Table 1. Data collection and refinement statistics of HEW lysozyme

|                                                       |                                                 |
|-------------------------------------------------------|-------------------------------------------------|
| Data collection statistics                            |                                                 |
| Space group                                           | P4 <sub>3</sub> 2 <sub>1</sub> 2                |
| Cell constants (Å)                                    | <i>a</i> = <i>b</i> = 77.326, <i>c</i> = 37.193 |
| Beamline                                              | SPring-8 BL26B1                                 |
| Detector                                              | CCD MSC saturnA200                              |
| Exposure time (sec /frame)                            | 10                                              |
| Wavelength (Å)                                        | 0.7                                             |
| Camera distance (mm)                                  | 150                                             |
| Resolution (Å)                                        | 50.0 – 1.00 (1.02 - 1.00)                       |
| Oscillation angel (deg.)                              | 1.0                                             |
| $\sigma$ cut-off                                      | 0.0                                             |
| $R_{\text{merge}}^{\text{a, b}}$                      | 0.072 (0.358)                                   |
| No. of measurements                                   | 984,794                                         |
| No. of independent reflections                        | 61,262                                          |
| Completeness (%)                                      | 93.9 (58.1)                                     |
| Multiplicity                                          | 17.1 (2.7)                                      |
| Mean $\langle I/\sigma(I) \rangle$                    | 63.8 (1.4)                                      |
| Refinement statistics                                 |                                                 |
| Resolution (Å)                                        | 26.804 - 1.300 (1.347 - 1.300)                  |
| No. of reflections used                               | 28,205 (2,764)                                  |
| Completeness (%)                                      | 99.63 (100.0)                                   |
| $R_{\text{work}}^{\text{c}}$                          | 0.150 (0.159)                                   |
| $R_{\text{free}}^{\text{c}}$                          | 0.186 (0.197)                                   |
| Number of chains (Average B factor (Å <sup>2</sup> )) |                                                 |
| Protein (chain A)                                     | 1 (15.18)                                       |
| Water (chain S)                                       | 231 (23.78)                                     |
| Na (chain NA)                                         | 1 (10.60)                                       |
| Cl (chain CL)                                         | 4 (16.32)                                       |
| Ethylene glycol (chain E)                             | 1 (21.07)                                       |
| R.m.s. deviations                                     |                                                 |
| Bond lengths (Å)                                      | 0.015                                           |
| Bond angles (°)                                       | 1.596                                           |

<sup>a</sup>  $R_{\text{merge}} = \sum_i ||I(h) - \langle I(h) \rangle| / \sum_i I(h)$ , where  $I(h)$  is the mean intensity after  $i$  rejections.

<sup>b</sup> Values in parentheses are for highest resolution shells.

<sup>c</sup>  $R_{\text{work}} = \sum |F_p - F_{\text{pc}}| / \sum |F_p|$ ;  $R_{\text{free}}$ , the same as  $R_{\text{work}}$  but calculated on 5% data excluded from refinement
